1 **Aging modulates the effects of scene complexity on visual search in naturalistic virtual**  
2 **environments**

3 **Isaiah J. Lachica<sup>1</sup>, Aniruddha Kalkar<sup>2</sup>, and James M. Finley<sup>1,3,4\*</sup>**

4 <sup>1</sup>Division of Biokinesiology and Physical Therapy, University of Southern California, Los  
5 Angeles, 90033, USA

6 <sup>2</sup>Department of Computer Science, University of Southern California, Los Angeles, 90089, USA

7 <sup>3</sup>Neuroscience Graduate Program, University of Southern California, Los Angeles, 90089, USA

8 <sup>4</sup>Department of Biomedical Engineering, University of Southern California, Los Angeles, 90089,  
9 USA

10 \*jmf@usc.edu

11

12 **Abstract**

13 Processing task-relevant visual information is important for the successful completion of  
14 many everyday tasks. Prior work demonstrated that aging is associated with increased  
15 susceptibility to distraction by salient stimuli. However, these studies often use simple stimuli  
16 and little is known about how aging influences visual attention in 3D environments that are more  
17 representative of real-world visual complexity. We asked young and older adults to complete a  
18 virtual reality-based visual search task with three levels of increasing visual complexity. As the  
19 visual complexity of the environment increased, all participants took longer to complete the task,  
20 in part because they increased the time spent re-fixating task-relevant objects and the time  
21 spent fixating task-irrelevant objects. We also found that older adults took longer to complete  
22 the task and spent more time re-fixating task-relevant objects and fixating task-irrelevant  
23 objects. In addition, we found that short-term and working memory capacities were related to  
24 multiple measures of performance in the visual search task. These results demonstrate the  
25 importance of assessing the effects of aging on the control of visual attention using tasks and  
26 environments that better capture features of the real world.

## 27 **Introduction**

28           Selecting and processing relevant visual information from the environment is vital for  
29 planning and executing everyday tasks<sup>1-4</sup>. For example, to successfully find one's luggage at a  
30 busy airport, it is essential to attend to visual features such as color and size to distinguish one's  
31 luggage from another passenger's. Both natural and human-made environments are filled with a  
32 broad range of visual stimuli that may be relevant or irrelevant for guiding future actions.  
33 Processing all stimuli is impractical as the capacity for visual information processing is limited<sup>5</sup>.  
34 What is ultimately perceived is dictated by what is selected for using visual attention<sup>6</sup>.

35           The control of visual attention has been prominently described as a balance between  
36 top-down and bottom-up processes. Bottom-up processes emphasize saliency, a characteristic  
37 of visual stimuli based on low-level visual features such as contrast and luminance<sup>7</sup>. Highly  
38 salient visual stimuli have the effect of "popping out" of a scene and capturing attention  
39 automatically. In contrast, top-down processes control visual attention based on cognitive  
40 control processes that prioritize factors such as task demands and prior knowledge<sup>8</sup>. When  
41 selecting a stimulus to direct visual attention towards, top-down cognitive processes modulate  
42 bottom-up saliency by enhancing the representation of a desired region or stimuli while  
43 inhibiting others<sup>9-11</sup>. The use of top-down cognitive control to modulate bottom-up processes  
44 has also been demonstrated at the neural level during visual search in naturalistic  
45 photographs<sup>12</sup>. As measured using fMRI, neural activity was increased for search objects and  
46 decreased for distractors. As such, while highly salient stimuli attempt to capture attention  
47 automatically, top-down cognitive control can inhibit this process, allowing attention to be  
48 focused on relevant visual information. Task-dependent trade-offs between top-down and  
49 bottom-up control enable attention to be freely directed based on top-down factors, such as  
50 when performing a task while allowing it to be captured by highly salient stimuli when  
51 necessary. However, this interaction appears to rely heavily on an individual's cognitive  
52 capacity, which has been demonstrated to be affected by normal aging.

53           There is evidence that older adults are more susceptible to distraction by irrelevant  
54 visual stimuli due to aging-related changes in their cognition. In particular, their ability to exert  
55 top-down inhibitory mechanisms has been shown to be impaired<sup>13–15</sup>. These effects prevent  
56 older adults from suppressing the automatic capture of attention by salient task-irrelevant  
57 stimuli, negatively affecting their performance in visually demanding tasks<sup>16–19</sup>. Impaired  
58 capacity for inhibition can also lead to task-irrelevant information being encoded into working  
59 memory at the cost of task-relevant information<sup>17,20</sup>. This increased distractibility from task-  
60 irrelevant stimuli is problematic as this may prevent older adults from completing everyday tasks  
61 and make them more vulnerable to accidents that may lead to injuries. However, these studies  
62 used simple visual scenes composed of arbitrarily selected shapes and letters. It is unclear  
63 whether these aging-related effects on visual attention extend to performing tasks in scenes  
64 more closely replicating the visual complexity in real-world environments.

65           Assessing the cognitive capacity of older adults, particularly their ability to direct visual  
66 attention appropriately, is important for developing interventions to improve their function in daily  
67 activities. The Trail Making Test<sup>21</sup>, especially part B, is a visual search task commonly used to  
68 assess cognitive domains such as visual attention, working memory, and inhibition<sup>22–24</sup>. It is  
69 typically implemented in a pen-and-paper format with numbers and letters as search targets,  
70 leaving questions about its ability to interrogate visual attention in environments that more  
71 closely resemble those encountered in the real world. Recent attempts have been made to  
72 increase the ecological validity of the Trail Making Test by transforming the task into a three-  
73 dimensional reaching-like task in virtual reality (VR)<sup>25</sup>. However, the generalizability of this  
74 three-dimensional adaptation to real-world experiences remains as the search targets do not  
75 simulate stimuli present in natural environments. In addition, both implementations of the Trail  
76 Making Test cannot provide moment-to-moment information on visual attention or visual search  
77 strategies as they only measure time to completion.

78 We aimed to determine how aging-related differences in cognition influence visual  
79 search and attention in naturalistic virtual environments. Participants performed a custom-  
80 designed VR-based visual search task in three visual complexity levels that closely simulated  
81 real-world environments<sup>26</sup>. Performance was quantified by measuring time to completion, and  
82 allocation of visual attention was analyzed by quantifying re-fixation time on task-relevant  
83 objects, fixation time on task-irrelevant objects, and the saliency of fixated regions of the visual  
84 scene. Additionally, all participants completed assessments of global cognition, short-term  
85 memory, working memory, and inhibitory capacity. We hypothesized that as the complexity of  
86 the visual scene increased, participants would exhibit longer task completion times caused by a  
87 decreased capacity to encode task-relevant stimuli in working memory and to inhibit task-  
88 irrelevant stimuli. In particular, all participants would be more prone to re-fixating search targets  
89 and directing their attention to salient, task-irrelevant distractors. In addition, we hypothesized  
90 that this performance decline would be greater in older adults due to aging-related impairments  
91 in their cognition.

## 92 **Results**

93 **Feature congestion.** The visual complexity of the three virtual environments used in the visual  
94 search task was quantified using feature congestion<sup>27</sup>. To determine whether manipulations of  
95 the virtual environments led to increasing levels of visual complexity, we performed Welch's  
96 analysis of variance to compare the feature congestion of the three visual complexity levels (Fig.  
97 1b). Feature congestion increased monotonically across visual complexity levels ( $F(2,1203.7) =$   
98  $28690$ ,  $p < 2.2e-16$ ). Post-hoc Bonferroni-corrected pairwise comparisons using Wilcoxon rank  
99 sum tests indicate that the high visual complexity level had greater feature congestion than the  
100 medium ( $p < 2e-16$ ) and low ( $p < 2e-16$ ) visual complexity levels. In addition, feature congestion  
101 was higher in the medium visual complexity level than in the low ( $p < 2e-16$ ).

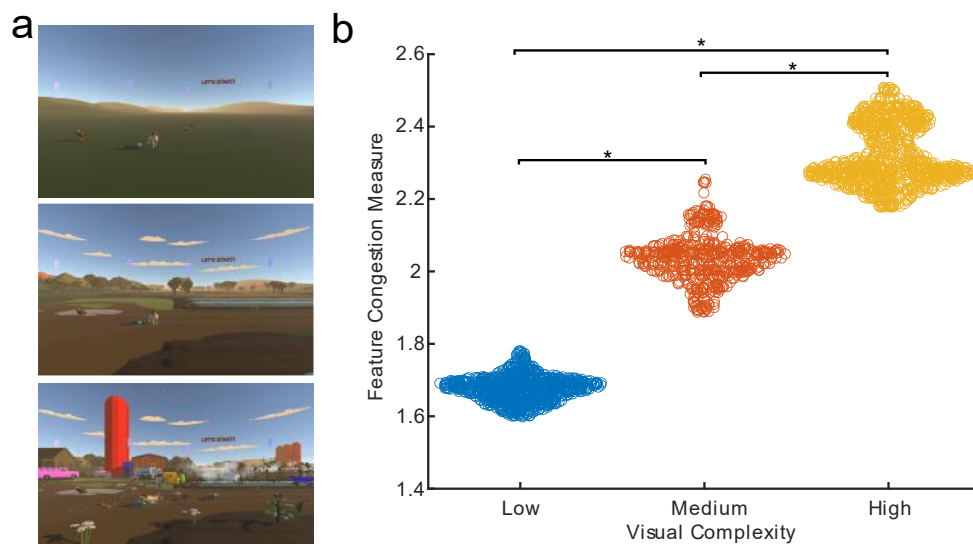

102  
103 **Figure 1.** Variation in feature congestion across the three visual complexity levels used in the  
104 visual search task. (a) Single frames from representative gameplay recordings of each visual  
105 complexity level. (b) Scatter plot comparing feature congestion of each visual complexity level  
106 with each data point representing a frame from representative gameplay recordings. \* indicates  
107 statistically significant differences between visual complexity levels at  $p < 0.05$ .

108 **Task completion times.** While all participants took longer to complete the task as the visual  
109 complexity of the environment increased, this effect was greater in older adults (Fig. 2a). There  
110 was a main effect of age group on task completion time ( $F(1,26) = 48.17, p = 2.277e-7$ ), with the  
111 older adults spending more time completing the task than young adults ( $p < 0.0001$ ). There was  
112 also a main effect of visual complexity level ( $F(2,52) = 74.82, p = 4.977e-16$ ), with all  
113 participants spending more time completing the task in the high visual complexity level  
114 compared to the low (Bonferroni-corrected  $p < 0.0001$ ) and medium (Bonferroni-corrected  $p <$   
115  $0.0001$ ) visual complexity levels. We also found an interaction between age group and visual  
116 complexity level ( $F(2,52) = 9.27, p = 3.596e-4$ ), with the difference in completion between age  
117 groups increasing with visual complexity level.

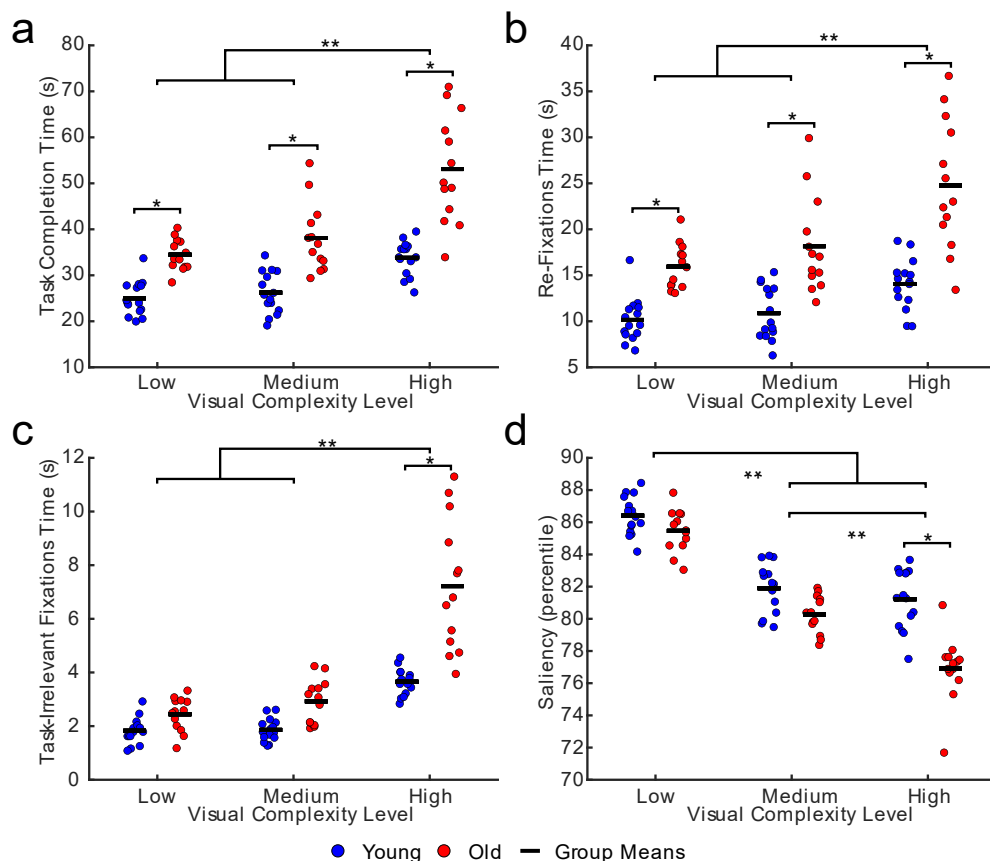

118 ● Young ● Old — Group Means  
119 **Figure 2.** Effect of age group and visual complexity level on task performance. (a) Task  
120 completion time, (b) re-fixation time on task-relevant objects, (c) fixation time on task-irrelevant  
121 objects, and (d) saliency of fixated regions. \*\* indicates statistically significant differences  
122 between visual complexity levels at  $p < 0.05$ . \* indicates statistically significant differences  
123 between age groups within a visual complexity level ( $p < 0.05$ ).

124 **Re-fixation time on task-relevant objects.** The increase in task completion time with visual  
125 complexity could be due to suboptimal search strategies, such as re-fixating task-relevant  
126 objects that were already fixated at an earlier time. As such, we next tested if longer task  
127 completion times for levels with higher visual complexity could be due to longer re-fixation times  
128 on task-relevant objects (Fig. 2b). A main effect of age group was found ( $F(1,26) = 37.16$ ,  $p =$   
129  $1.924e-6$ ), with the older adults exhibiting longer re-fixation times on task-relevant objects than  
130 young adults ( $p < 1e-4$ ). A main effect of visual complexity was also found ( $F(2,52) = 42.37$ ,  $p =$   
131  $1.208e-11$ ), with all participants demonstrating longer re-fixation times on task-relevant objects  
132 longer in the high visual complexity level as compared to the low (Bonferroni-corrected  $p <$   
133  $0.0001$ ) and medium (Bonferroni-corrected  $p < 1e-4$ ) visual complexity levels. An interaction

134 between age group and visual complexity level was also found ( $F(2,52) = 6.07, p = 0.004223$ ),  
135 such that the difference in average re-fixation time between age groups increased with visual  
136 complexity level.

137 **Fixation time on task-irrelevant objects.** Participants may have also taken longer to complete  
138 the task as visual complexity increased because they were more susceptible to distraction and  
139 spent more time fixating task-irrelevant objects (Fig. 2c). A main effect of age group was found  
140 on the amount of time fixating task-irrelevant objects ( $F(1,26) = 27.96, p = 1.575e-5$ ), with the  
141 older adults fixating task-irrelevant objects longer than young adults ( $p < 1e-4$ ). A main effect of  
142 visual complexity was also found ( $F(2,52) = 142.434, p < 2.2e-16$ ), with all participants spending  
143 more time fixating task-irrelevant objects in the high visual complexity level as compared to the  
144 low (Bonferroni-corrected  $p < 0.0001$ ) and medium (Bonferroni-corrected  $p < 1e-4$ ) visual  
145 complexity levels. There was also an interaction between age group and visual complexity level  
146 ( $F(2,52) = 26.598, p = 1.107e-8$ ), such that the difference in the time that young and older adults  
147 spent fixating task-irrelevant objects increased with visual complexity level.

148 **Saliency of fixated regions.** Although both young and older adults fixated longer on task-  
149 irrelevant objects as the visual complexity of the environment increased, it does not appear to  
150 be caused by increased fixations to salient distractors (Fig. 2d). A main effect of age group on  
151 the saliency of fixated regions was found ( $F(1,26) = 32.55, p = 5.279e-6$ ), with older adults  
152 fixating regions that are less salient than those fixated by young adults ( $p < 1e-4$ ). A main effect  
153 of visual complexity was also found ( $F(2,52) = 186.37, p < 2.2e-16$ ). All participants fixated more  
154 salient regions in the low visual complexity level compared to the medium (Bonferroni-corrected  
155  $p < 1e-4$ ) and hard (Bonferroni-corrected  $p < 1e-4$ ) visual complexity levels. In addition, all  
156 participants also fixated more salient regions in the medium visual complexity level than the high  
157 visual complexity level (Bonferroni-corrected  $p < 1e-4$ ). There was also an interaction between  
158 age group and visual complexity ( $F(2,52) = 11.83, p = 5.846e-5$ ), such that between-group  
159 differences in the saliency of fixated regions increased with the level of visual complexity.

160 **Cognitive assessment scores.** Age-related differences were observed in several standard  
 161 cognitive assessments (Table 1). In particular, older adults had lower global cognition according  
 162 to their Montreal Cognitive Assessment scores (Wilcoxon rank sum test  $p = 0.0440$ ) and poorer  
 163 short-term memory according to their Corsi Block task results (Wilcoxon rank sum test  $p =$   
 164  $0.0014$ ). However, no differences were found in executive function, task switching, or inhibition.

| <b>Cognitive Assessment</b>          | <b>Cognitive Domain</b>            | <b>Young Adults (Mean ± SD)</b> | <b>Older Adults (Mean ± SD)</b> | <b>P-value</b> |
|--------------------------------------|------------------------------------|---------------------------------|---------------------------------|----------------|
| <i>Montreal Cognitive Assessment</i> | Global Cognition                   | 28 ± 2                          | 27 ± 3                          | 0.0440 *       |
| <i>Trail Making Test-B</i>           | Executive Function, Task-Switching | 63 ± 20 s                       | 65 ± 23 s                       | 0.8012         |
| <i>Corsi Block Test (Forwards)</i>   | Short Term Memory                  | 6 ± 1                           | 5 ± 1                           | 0.0014 *       |
| <i>Corsi Block Test (Backwards)</i>  | Working Memory                     | 5 ± 1                           | 5 ± 2                           | 0.229          |
| <i>Stroop Test</i>                   | Inhibition                         | 58.87 ± 110.17 ms               | 110.69 ± 144.78 ms              | 0.293          |
| <i>Flanker Test</i>                  | Inhibition                         | 5 ± 70.17 ms                    | -10.77 ± 95.82 ms               | 0.6203         |

165 **Table 1.** Cognitive assessment scores (Mean ± SD) of young and older adults with the  
 166 corresponding p-value from their comparisons using two-sample t-tests and Wilcoxon rank sum  
 167 tests. \* indicates statistically significant differences between age groups at  $p < 0.05$ .

168 **Task performance and cognition.** Longer task completion times were associated with  
 169 decreased short-term and working memory capacity across all participants (Fig. 3). A multiple  
 170 linear regression model was used to test if short-term memory (Corsi Block task), working  
 171 memory (Backwards Corsi Block task), and inhibitory capacity (Stroop and Flanker tasks) were  
 172 associated with task completion time. The final regression model included the Corsi Block task  
 173 and Backward Corsi Block task (Adjusted  $R^2 = 0.48$ ,  $F(4,23) = 7.219$ ,  $p = 6.416e-4$ ) with higher  
 174 scores on the Corsi Block task (Fig. 3a;  $\beta = -4.27$ ,  $p = 0.0299$ ) and Backwards Corsi Block task  
 175 (Fig 3b;  $\beta = -3.46$ ,  $p = 0.0221$ ) being associated with faster task completion time.



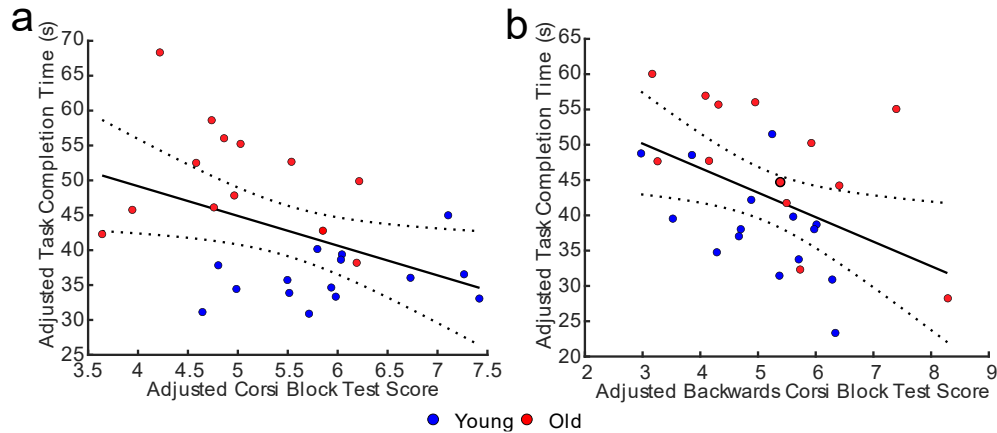

176  
177 **Figure 3.** Added variable plots showing relationships between task performance and memory  
178 capacities. (a) Short-term memory capacity assessed using the Corsi Block task, and (b)  
179 working memory capacity assessed using the Backwards Corsi Block task.

180 **Re-fixation time and cognition.** Longer re-fixation times on task-relevant objects were  
181 associated with decreased short-term and working memory capacity across all participants (Fig.  
182 4). A multiple linear regression model was fit to determine if short-term (Corsi Block task) and  
183 working (Backwards Corsi Block task) memory capacities were associated with re-fixation time  
184 on task-relevant objects. The final regression model included both assessments of memory  
185 (Adjusted  $R^2 = 0.45$ ,  $F(2,25) = 12.07$ ,  $p = 2.146e-4$ ) with higher scores on the Corsi Block task  
186 (Fig. 4a;  $\beta = -2.36$ ,  $p = 0.0396$ ) and Backwards Corsi Block task (Fig. 4b;  $\beta = -2.11$ ,  $p = 0.0189$ )  
187 being associated with shorter re-fixation times on task-relevant objects.

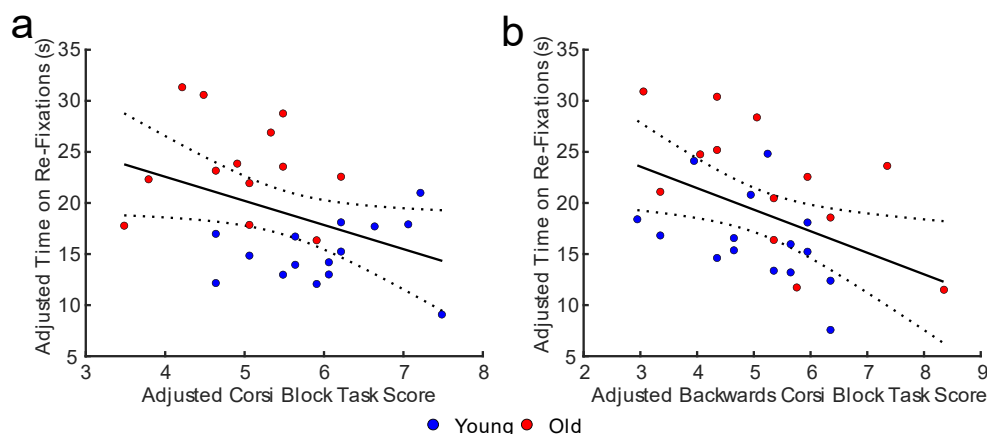

188  
189 **Figure 4.** Added variable plots showing relationships between re-fixation time on task-relevant  
190 objects and memory capacities. (a) Short-term memory capacity assessed using the Corsi Block  
191 task and (b) working memory capacity assessed using the Backwards Corsi Block task.

192 **Discussion**

193           We used a custom-designed VR-based visual search task to determine if age-dependent  
194 differences in the control of visual attention are observed in environments that simulate real-  
195 world visual complexity. In addition, we also sought to understand which cognitive domains are  
196 associated with decreased performance in the task. As the visual complexity of the virtual  
197 environments increased, participants spent more time completing the task and had longer re-  
198 fixation times on task-relevant and task-irrelevant objects. Each of these effects was greater in  
199 older than younger adults. However, increased distraction did not appear to be influenced by  
200 saliency in both groups, as the saliency of the fixated regions decreased as the visual  
201 complexity level increased. In addition, we found that the variability in performance across  
202 participants was explained, in part, by short-term and working memory capacities.

203           As the complexity of the virtual environments increased, we found that all participants  
204 spent more time completing the search task. These results are consistent with those classically  
205 found in simple conjunction paradigms with simple stimuli composed of arbitrarily selected  
206 shapes and colors. In particular, when participants were asked to search for stimuli that shared  
207 features with distractors, search times increased as the number of distractors in the visual  
208 display increased<sup>28</sup>. Our results indicate that the effect of visual complexity on task performance  
209 was greater in older adults. Similar age-related differences in performance have been previously  
210 demonstrated using simple conjunction search paradigms<sup>29-31</sup>. These results have also been  
211 replicated in paradigms that used more complex stimuli. When participants were tasked with  
212 searching for and responding to a star-shaped stimulus in a vehicle's digital dashboard, search  
213 times increased as the visual complexity of the display increased, with the effect being greater  
214 in older adults<sup>32</sup>. In a different study where participants were instructed to search for a specific  
215 face configuration among distractor faces, search times increased with the number of  
216 distractors, with the effect being similarly greater in older adults<sup>33</sup>. As such, it can be said that  
217 the negative effect of aging, visual complexity, and their combination on search performance

218 generalizes from two-dimensional displays to more naturalistic, three-dimensional virtual  
219 environments.

220         Decreased performance in the search task as the visual complexity of the virtual  
221 environments increased coincided with longer fixation times on task-irrelevant objects in all  
222 participants. This increase in fixation time on task-irrelevant objects could be due to a  
223 decreased capacity for top-down suppression of irrelevant stimuli with increasing visual  
224 complexity of search displays<sup>34</sup>, making all participants more susceptible to fixating task-  
225 irrelevant objects. Additionally, the effect of visual complexity on fixation times on task-irrelevant  
226 objects was greater in older adults. Increased susceptibility to distraction by task-irrelevant  
227 information in older adults has been attributed to cognitive impairments, particularly with  
228 deficiencies in inhibitory capacity<sup>13,14</sup>. This increased distractibility has been previously shown  
229 across a range of two-dimensional visual-perceptual tasks<sup>16–19,35</sup>. Together, these findings  
230 support the notion that visual attention, and by extension, performance in a visual search task,  
231 is affected not only by the visual complexity of the environment but also by aging. Interestingly,  
232 while fixation times on task-irrelevant objects increased with visual complexity, these times only  
233 accounted for a small portion of the task completion time. This finding is consistent with  
234 previous studies, which found that visual attention is allocated primarily toward task-relevant  
235 stimuli when completing various tasks<sup>3,4,36,37</sup>.

236         While all participants became more prone to distraction by task-irrelevant stimuli as  
237 visual complexity increased, this effect does not seem to be driven by the saliency of these  
238 stimuli. In particular, the saliency of fixated regions decreased as the visual complexity of the  
239 virtual environments increased. This finding is inconsistent with previous studies showing that  
240 the susceptibility to distraction is greater in the presence of salient visual stimuli, particularly in  
241 older adults. In an onset distractor task, while young and older adults were similarly distracted  
242 when the search targets and the distractors had the same luminance, older adults became more  
243 susceptible to distraction when the distractors were more salient by making them brighter<sup>16</sup>.

244 Similarly, older adults were more distracted when distractors' saliency increased in selective  
245 attention tasks with task-relevant and task-irrelevant stimuli superimposed on each other<sup>18,35</sup>.  
246 The ability of visual stimuli to automatically capture visual attention may not be contingent upon  
247 the stimuli being highly salient. Instead, people may fixate more on task-irrelevant stimuli  
248 because greater demands are placed on information processing and memory as the complexity  
249 of the environment increases. Future studies should consider manipulating both the visual  
250 complexity of the search environments and the saliency of the stimuli present to better  
251 determine the role of saliency in visual information processing in naturalistic environments.

252 Proper allocation of visual attention is important for successfully completing visual  
253 search tasks, and it appears to rely on intact cognition. Performance in our task was related to  
254 participants' short-term and working memory capacity, as those who scored higher in the Corsi  
255 block task and the Backwards Corsi block task demonstrated faster task completion times. In  
256 addition, we found a relationship between re-fixation times on task-relevant objects and both  
257 short-term and working memory. Participants with shorter re-fixation times on task-relevant  
258 objects also scored higher in the Corsi block and Backwards Corsi block tasks. These findings  
259 echo the importance of short-term and working memory capacity on visual attention<sup>36,38,39</sup>, which  
260 has been demonstrated in simple selective attention<sup>40</sup> and visual search<sup>33</sup> tasks. Beyond  
261 memory, inhibitory capacity is another cognitive domain that influences the allocation of visual  
262 attention and the successful completion of visual search tasks. As previously discussed,  
263 inhibitory capacity allows for the proper allocation of visual attention by selecting for and  
264 processing information relevant to the task while suppressing those that are irrelevant.  
265 Surprisingly, scores on cognitive assessments that specifically targeted inhibitory capacity were  
266 not found to be related to task completion times, despite all participants spending more time  
267 fixating task-irrelevant objects as task completion time increased. It is possible that the Stroop  
268 and Flanker tasks failed to capture the domain of inhibitory capacity that is particular to the

269 visuospatial nature of the task. Future studies would benefit from including assessments that  
270 target multiple domains of inhibitory capacity.

271 In conclusion, susceptibility to distraction by task-irrelevant information increases with  
272 the environment's complexity. This negative effect was greater in older adults, likely driven by  
273 age-related changes in their cognition. Increased susceptibility to distraction is potentially  
274 problematic as suboptimal allocation of visual attention may lead to difficulties completing  
275 everyday tasks and potentially can lead to injuries, such as when navigating complex terrain.  
276 Results from this study highlight the importance of using tasks with designs that closely simulate  
277 real-world conditions and everyday behaviors to accurately assess cognitive capacity,  
278 particularly in older adults.

## 279 **Methods**

280 **Participants.** 15 young (9 female, age:  $27.7 \pm 3.33$  years) and 15 older adults (9 female, age:  
281  $71.8 \pm 4.46$  years) with normal or corrected-to-normal vision participated in the study. Data from  
282 two older adults were excluded due to hardware/software issues. All study procedures were  
283 reviewed and approved by the University of Southern California's Institutional Review Board. All  
284 participants provided written informed consent before participating and were provided monetary  
285 compensation for their time. All aspects of the study conformed to the principles described in the  
286 Declaration of Helsinki.

287 **Experimental protocol.** After informed consent was obtained, all participants completed a  
288 battery of tests to assess different domains of cognition. Two of these assessments, the  
289 Montreal Cognitive Assessment<sup>41</sup> and the Trail Making Test-B<sup>21</sup>, were administered on paper  
290 and were used to assess global cognition and executive function, respectively while the rest  
291 were provided on a computer through Psytoolkit<sup>42,43</sup>. Of these computer-based assessments,  
292 the Corsi task<sup>44</sup> was used to assess short-term memory, the backward Corsi task<sup>45</sup> for working  
293 memory, and both the Stroop<sup>46</sup> and Flanker<sup>47</sup> tasks for inhibition.

294           After completing the cognitive assessments, the participants performed three  
295 familiarization trials for the visual search task. The first trial consisted of the experimenter  
296 guiding the participant through a single round of the task to provide a clear description of the  
297 goal of the task, the visual and auditory feedback that they will encounter, and the search target  
298 sequence. The guided familiarization trial was followed by two more trials where participants  
299 completed the task independently and were only provided feedback by the experimenter at the  
300 end. After the familiarization trials, the participants completed 30 trials of the visual search task  
301 presented in three sets of 10 trials, each corresponding to a different visual complexity level.  
302 **VR task.** Participants performed a VR-based visual search task (Fig. 1a) designed using  
303 principles of the Trail Making Test-B<sup>21</sup>. The Trail Making Test-B was selected based on its ability  
304 to test various cognitive domains, including visual attention, working memory, and inhibition<sup>22-24</sup>.  
305 They were instructed to search for and select targets alternating between letters of the alphabet  
306 and objects whose names start with those letters in ascending order. The search targets were  
307 positioned randomly in the virtual environment, and their position changed for each trial. The  
308 participants viewed the virtual environments using the HTC Vive Pro Eye (HTC, New Taipei,  
309 Taiwan) head-mounted display. To interact with the environment and select search targets, the  
310 participants used an HTC Vive Controller (HTC, New Taipei, Taiwan). A laser pointer extended  
311 from the top of the controller in the virtual environment, and participants selected targets by  
312 aiming the laser at the center of the target and pulling the trigger on the controller. Visual and  
313 auditory feedback was provided to indicate whether the selected target was correct. Specifically,  
314 a bell sound was played, and a “Correct!” text appeared in the environment when the correct  
315 target was selected. In contrast, a buzzer sound was played, and a “Try Again!” text appeared  
316 when the selected target was incorrect or when the correct target was not selected properly  
317 (laser not aimed at the center of the target).

318           The visual search task was performed in virtual environments with three levels of  
319 increasing visual complexity (Fig. 1a). The sequence of complexity levels experienced by

320 participants was pseudo-randomized such that five participants in both young and older adult  
321 groups started with the low visual complexity level, five other participants started with the  
322 medium visual complexity level, and the rest started with the high visual complexity level. The  
323 visual complexity of the environment was manipulated by increasing the number of visual  
324 distractors in the foreground and background and was measured using feature congestion<sup>27</sup>.  
325 Feature congestion quantifies the distribution of low-level visual features of an image, which  
326 includes color, edge orientation, and luminance, as a single scalar measure with higher values  
327 indicating a more complex image. To determine if the modifications to the virtual environments  
328 produced increasing levels of visual complexity, we measured the feature congestion method in  
329 every frame of representative gameplay recording from each visual complexity level (using  
330 Rosenholtz et al.'s Matlab implementation: <https://dspace.mit.edu/handle/1721.1/37593>).  
331 **Data collection and processing.** Eye and head movement data were collected at 90Hz  
332 throughout each trial using eye trackers and an inertial measurement unit built into the HTC  
333 Vive Pro Eye. The eye trackers were calibrated following a 5-point calibration process provided  
334 by HTC. Additionally, video recordings of the first-person point of view of the participants were  
335 also recorded at 60 Hz for each trial using NVIDIA Shadowplay. All data processing was  
336 performed using a custom script in MATLAB R2022a (Mathworks, Natick, MA). Horizontal and  
337 vertical eye-in-head angles were calculated from the raw eye movement data and were  
338 combined with the horizontal and vertical rotations of the head to compute gaze angles. The  
339 gaze angles were then time-synchronized with the video recordings. Since the video recordings  
340 and the gaze angles did not have the same sampling rate, the gaze angles were then  
341 interpolated at each video recording frame.

342 As visual processing only occurs during periods of fixation<sup>48,49</sup>, it was important to  
343 identify which samples qualify as such to determine how visual attention was deployed  
344 throughout each trial. A simple velocity threshold was used to identify whether a sample is a  
345 fixation or a saccade. First, horizontal and vertical gaze angular velocities were calculated by



346 differentiating the interpolated gaze angles with respect to the time between video frames. A  
347 sample was categorized as a fixation if its horizontal or vertical gaze angular velocity was less  
348 than 100 degrees per second<sup>50</sup>.

349         Fixations were then classified as task-relevant or task-irrelevant based on the identity of  
350 the object being fixated. Gaze vectors were projected in the virtual environment with their origins  
351 based on head position in the virtual environment and their direction determined by the gaze  
352 angles. If the gaze vectors intersected a search target, the name of the fixated search target  
353 was recorded and identified as a task-relevant fixation. In contrast, if the gaze vector did not  
354 intersect a search target, it was identified as a task-irrelevant fixation. Fixation times on task-  
355 irrelevant objects and re-fixation times on task-relevant objects were then calculated.

356         Saliency maps were created from each frame of every recording based on the original  
357 Itti, Koch, and Neibur<sup>51</sup> algorithm as implemented by Harel (J. Harel, A Saliency Implementation  
358 in MATLAB: <http://vision.caltech.edu/~harel/share/gbvs.php>). Each video frame was  
359 decomposed into feature maps of its low-level visual features, which included color, orientation,  
360 and intensity. These feature maps were then combined into a saliency map with corresponding  
361 scalar values for each pixel. These scalar saliency values were then converted to percentile  
362 ranks<sup>52,53</sup>, with 100% indicating the most salient pixel while 0% the least salient pixel in the  
363 video frame.

364 **Statistical analysis.** All statistical analyses were performed in R (R Project for Statistical  
365 Computing) with the alpha value set at  $p < 0.05$ . Tests for normality and equal variances were  
366 performed using the Shapiro-Wilk test and Levene's test with functions from the *stats* and *car*  
367 packages, respectively. Welch's analysis of variance and pairwise Wilcoxon rank sum tests  
368 were used to compare the feature congestion of each visual complexity level using the *stats*  
369 package as assumptions of equal variance and normality were violated.

370         Linear mixed-effects models were fit using the *lme4* package to test for the effects of age  
371 group, visual complexity, and their interaction on VR task completion time, re-fixation time on



372 task-relevant objects, fixation time on task-irrelevant objects, and saliency of fixated regions.  
373 Fixed effects p-values were calculated using the *lmerTest* package, which uses Satterthwaite  
374 approximations for the degrees of freedom. For all models, random intercepts for each  
375 participant were added to account for repeated measures. Post-hoc Bonferroni-corrected  
376 pairwise comparisons were performed using the *emmeans* package when significant main  
377 effects or interactions, particularly differences between age groups within visual complexity  
378 levels, were found.

379 Cognitive assessment scores were compared between age groups to determine the  
380 effect of age on various domains of cognition using functions from the *stats* package.  
381 Assumptions of normality and equal variance were tested using the Shapiro-Wilk and Levene's  
382 tests, respectively. The Wilcoxon rank sum test was used when the normality assumption was  
383 violated; otherwise, a two-sample t-test was used.

384 Multiple linear regression was used to test for associations between cognition and task  
385 performance measures. In particular, task completion time was used as the response, while  
386 scores on the Corsi Block task, Backwards Corsi Block task, Stroop task, and Flanker task were  
387 used as predictors. A separate multiple linear regression was used to test for associations  
388 between re-fixation times on task-relevant objects and measures of memory capacity.  
389 Specifically, re-fixation time on task-relevant objects was used as the response, while scores on  
390 the Corsi Block task and the Backwards Corsi Block task were used as predictors.

### 391 **Data Availability**

392 The analyzed data from this study are available from the corresponding author upon reasonable  
393 request.

### 394 **References**

- 395 1. Land, M. F. & Hayhoe, M. In what ways do eye movements contribute to everyday  
396 activities? *Vision Res* **41**, 3559–3565 (2001).
- 397 2. Land, M. F. Eye movements and the control of actions in everyday life. *Prog Retin Eye*  
398 *Res* **25**, 296–324 (2006).

- 399 3. Hayhoe, M. & Ballard, D. Eye movements in natural behavior. *Trends in Cognitive*  
400 *Neuroscience* **9**, 188–194 (2005).
- 401 4. Hayhoe, M. M. & Rothkopf, C. A. Vision in the natural world. *Wiley Interdiscip Rev Cogn*  
402 *Sci* **2**, 158–166 (2011).
- 403 5. Gazzaniga, M. S., Ivry, R. B. & Mangun, G. R. (George R. *Cognitive neuroscience: the*  
404 *biology of the mind*. (W.W. Norton & Company, 2019).
- 405 6. Goldberg, M. E. & Wurtz, R. H. Visual Processing and Action. in *Principles of Neural*  
406 *Science* (eds. Kandel, E. R., Schwartz, J. H., Jessell, T. M., Siegelbaum, S. A. &  
407 Hudspeth, A. J.) 638–653 (McGraw-Hill, 2013).
- 408 7. Itti, L. & Koch, C. Computational modelling of visual attention. *Nat Rev Neurosci* **2**, 194–  
409 203 (2001).
- 410 8. Tatler, B. W., Hayhoe, M. M., Land, M. F. & Ballard, D. H. Eye guidance in natural vision:  
411 Reinterpreting salience. *J Vis* **11**, (2011).
- 412 9. Cosman, J. D., Lowe, K. A., Zinke, W., Woodman, G. F. & Schall, J. D. Prefrontal Control  
413 of Visual Distraction. *Current Biology* **28**, 414-420.e3 (2018).
- 414 10. Gaspelin, N. & Luck, S. J. The Role of Inhibition in Avoiding Distraction by Salient Stimuli.  
415 *Trends Cogn Sci* **22**, 79–92 (2018).
- 416 11. Gaspelin, N. & Luck, S. J. Inhibition as a potential resolution to the attentional capture  
417 debate. *Curr Opin Psychol* **29**, 12–18 (2019).
- 418 12. Seidl, K. N., Peelen, M. V & Kastner, S. Neural Evidence for Distracter Suppression  
419 during Visual Search in Real-World Scenes. *The Journal of Neuroscience* **32**, 11812–  
420 11819 (2012).
- 421 13. Dempster, F. N. The rise and fall of the inhibitory mechanism: Toward a unified theory of  
422 cognitive development and aging. *Developmental Review* **12**, 45–75 (1992).
- 423 14. Lustig, C., Hasher, L. & Zacks, R. T. Inhibitory deficit theory: Recent developments in a  
424 ‘new view’. in *Inhibition in cognition* (eds. Gorfein, D. S. & Macleod, C. M.) 145–162  
425 (American Psychological Association, 2007).
- 426 15. Gazzaley, A. & Mark D’esposito, A. Top-Down Modulation and Normal Aging. *Ann N Y*  
427 *Acad Sci* **1097**, 67–83 (2007).
- 428 16. Kramer, A. F., Hahn, S., Irwin, D. E. & Theeuwes, J. Age differences in the control of  
429 looking behavior: Do You Know Where Your Eyes Have Been? *Psychol Sci* **11**, 210–217  
430 (2000).
- 431 17. Schmitz, T. W., Cheng, F. H. T. & De Rosa, E. Failing to ignore: paradoxical neural  
432 effects of perceptual load on early attentional selection in normal aging. *J Neurosci* **30**,  
433 14750–14758 (2010).
- 434 18. Schmitz, T. W., Dixon, M. L., Anderson, A. K. & De Rosa, E. Distinguishing attentional  
435 gain and tuning in young and older adults. *Neurobiol Aging* **35**, 2514–2525 (2014).

- 436 19. Mertes, C., Wascher, E. & Schneider, D. Compliance instead of flexibility? On age-related  
437 differences in cognitive control during visual search. *Neurobiol Aging* **53**, 169–180 (2017).
- 438 20. Gazzaley, A. *et al.* Age-related top-down suppression deficit in the early stages of cortical  
439 visual memory processing. *Proceedings of the National Academy of Sciences* **105**,  
440 13122–13126 (2008).
- 441 21. Reitan, R. M. Validity of the Trail Making Test as an indicator of organic brain damage.  
442 *Percept Mot Skills* **8**, 271 (1958).
- 443 22. Sánchez-Cubillo, I. *et al.* Construct validity of the Trail Making Test: Role of task-  
444 switching, working memory, inhibition/interference control, and visuomotor abilities.  
445 *Journal of the International Neuropsychological Society* vol. 15 438–450 Preprint at  
446 <https://doi.org/10.1017/S1355617709090626> (2009).
- 447 23. Salthouse, T. A. What cognitive abilities are involved in trail-making performance?  
448 *Intelligence* **39**, 222 (2011).
- 449 24. Llinàs-Reglà, J. *et al.* The Trail Making Test. *Assessment* **24**, 183–196 (2017).
- 450 25. Plotnik, M. *et al.* Multimodal immersive trail making-virtual reality paradigm to study  
451 cognitive-motor interactions. *J Neuroeng Rehabil* **18**, 1–16 (2021).
- 452 26. Adlakha, G. *et al.* Development of a virtual reality assessment of visuospatial function and  
453 oculomotor control. in *2021 IEEE Conference on Virtual Reality and 3D User Interfaces*  
454 *Abstracts and Workshops (VRW)* 753–754 (Institute of Electrical and Electronics  
455 Engineers Inc., 2021). doi:10.1109/VRW52623.2021.00259.
- 456 27. Rosenholtz, R., Li, Y. & Nakano, L. Measuring visual clutter. *J Vis* **7**, 17–17 (2007).
- 457 28. Treisman, A. M. & Gelade, G. A feature-integration theory of attention. *Cogn Psychol* **12**,  
458 97–136 (1980).
- 459 29. Folk, C. L. & Lincourt, A. E. The effects of age on guided conjunction search. *Exp Aging*  
460 *Res* **22**, 99–118 (1996).
- 461 30. Hommel, B., Li, K. Z. H. & Li, S. C. Visual search across the life span. *Dev Psychol* **40**,  
462 545–558 (2004).
- 463 31. Müller-Oehring, E. M., Schulte, T., Rohlfing, T., Pfefferbaum, A. & Sullivan, E. V. Visual  
464 Search and the Aging Brain: Discerning the Effects of Age-related Brain Volume  
465 Shrinkage on Alertness, Feature Binding, and Attentional Control. *Neuropsychology* **27**,  
466 48 (2013).
- 467 32. Lee, S. C., Kim, Y. W. & Ji, Y. G. Effects of visual complexity of in-vehicle information  
468 display: Age-related differences in visual search task in the driving context. *Appl Ergon*  
469 **81**, 102888 (2019).
- 470 33. Aziz, J. R., Good, S. R., Klein, R. M. & Eskes, G. A. Role of aging and working memory in  
471 performance on a naturalistic visual search task. *Cortex* **136**, 28–40 (2021).

- 472 34. Bonacci, L. M., Bressler, S., Kwasa, J. A. C., Noyce, A. L. & Shinn-Cunningham, B. G.  
473 Effects of Visual Scene Complexity on Neural Signatures of Spatial Attention. *Front Hum*  
474 *Neurosci* **14**, 91 (2020).
- 475 35. Tsvetanov, K. A., Mevorach, C., Allen, H. & Humphreys, G. W. Age-related differences in  
476 selection by visual saliency. *Atten Percept Psychophys* **75**, 1382–1394 (2013).
- 477 36. Hayhoe, M. M. Vision and Action. *Annu Rev Vis Sci* **3**, 389–413 (2017).
- 478 37. Rothkopf, C. A., Ballard, D. H. & Hayhoe, M. M. Task and context determine where you  
479 look. *J Vis* **7**, (2007).
- 480 38. Madden, D. J. Aging and Visual Attention. *Curr Dir Psychol Sci* **16**, 70 (2007).
- 481 39. Diamond, A. Executive Functions. *Annu Rev Psychol* **64**, 135–168 (2013).
- 482 40. Shipstead, Z., Harrison, T. L. & Engle, R. W. Working memory capacity and visual  
483 attention: Top-down and bottom-up guidance. *Quarterly Journal of Experimental*  
484 *Psychology* **65**, 401–407 (2012).
- 485 41. Nasreddine, Z. S. *et al.* The Montreal Cognitive Assessment, MoCA: A Brief Screening  
486 Tool For Mild Cognitive Impairment. *J Am Geriatr Soc* **53**, 695–699 (2005).
- 487 42. Stoet, G. PsyToolkit: A software package for programming psychological experiments  
488 using Linux. *Behav Res Methods* **42**, 1096–1104 (2010).
- 489 43. Stoet, G. PsyToolkit: A Novel Web-Based Method for Running Online Questionnaires and  
490 Reaction-Time Experiments. *Teaching of Psychology* **44**, 24–31 (2017).
- 491 44. Corsi, P. M. Memory and the medial temporal region of the brain. (McGill University,  
492 1972).
- 493 45. Isaacs, E. B. & Vargha-Khadem, F. Differential course of development of spatial and  
494 verbal memory span: A normative study. *British Journal of Developmental Psychology* **7**,  
495 377–380 (1989).
- 496 46. Stroop, J. R. Studies of interference in serial verbal reactions. *J Exp Psychol* **18**, 643–662  
497 (1935).
- 498 47. Eriksen, B. A. & Eriksen, C. W. Effects of noise letters upon the identification of a target  
499 letter in a nonsearch task. *Percept Psychophys* **16**, 143–149 (1974).
- 500 48. Matin, E. Saccadic suppression: a review and an analysis. *Psychol Bull* **81**, 899–917  
501 (1974).
- 502 49. Rayner, K. Eye movements and attention in reading, scene perception, and visual  
503 search. *Q J Exp Psychol (Hove)* **62**, 1457–1506 (2009).
- 504 50. Salvucci, D. D. & Goldberg, J. H. Identifying Fixations and Saccades in Eye-Tracking  
505 Protocols. in *Proceedings of the EyeTracking Research and Applications Symposium 71–*  
506 *78* (Association for Computing Machinery, 2000).  
507 doi:<https://doi.org/10.1145/355017.355028>.

- 508 51. Itti, L., Koch, C. & Niebur, E. A model of saliency-based visual attention for rapid scene  
509 analysis. *IEEE Trans Pattern Anal Mach Intell* **20**, 1254–1259 (1998).
- 510 52. Le Meur, O. & Baccino, T. Methods for comparing scanpaths and saliency maps:  
511 Strengths and weaknesses. *Behav Res Methods* **45**, 251–266 (2013).
- 512 53. Kretch, K. S. & Adolph, K. E. Active vision in passive locomotion: Real-world free viewing  
513 in infants and adults. *Dev Sci* **18**, 736–750 (2015).

#### 514 **Acknowledgements**

515 This work was supported by NSF Award 2043637.

#### 516 **Author Contributions**

517 IJL and JMF conceived and designed the experiment. IJL and AK developed the VR-based  
518 visual search task. IJL collected the data. IJL and JMF analyzed the data and interpreted the  
519 results. IJL and JMF drafted, edited, and revised the manuscript. IJL, AK, and JMF approved  
520 the final version of the manuscript.

#### 521 **Additional Information**

522 **Competing interests:** The authors declare no competing interests.

523

524 **Figure 1.** Variation in feature congestion across the three visual complexity levels used in the  
525 visual search task. (a) Single frames from representative gameplay recordings of each visual  
526 complexity level. (b) Scatter plot comparing feature congestion of each visual complexity level  
527 with each data point representing a frame from representative gameplay recordings. \* indicates  
528 statistically significant differences between visual complexity levels at  $p < 0.05$ .

529

530 **Figure 2.** Effect of age group and visual complexity level on task performance. (a) Task  
531 completion time, (b) re-fixation time on task-relevant objects, (c) fixation time on task-irrelevant  
532 objects, and (d) saliency of fixated regions. \*\* indicates statistically significant differences  
533 between visual complexity levels at  $p < 0.05$ . \* indicates statistically significant differences  
534 between age groups within a visual complexity level ( $p < 0.05$ ).

535

536 **Figure 3.** Added variable plots showing relationships between task performance and memory  
537 capacities. (a) Short-term memory capacity assessed using the Corsi Block task, and (b)  
538 working memory capacity assessed using the Backwards Corsi Block task.

539

540 **Figure 4.** Added variable plots showing relationships between re-fixation time on task-relevant  
541 objects and memory capacities. (a) Short-term memory capacity assessed using the Corsi Block  
542 task and (b) working memory capacity assessed using the Backwards Corsi Block task.

543

544 **Table 1.** Cognitive assessment scores (Mean  $\pm$  SD) of young and older adults with the  
545 corresponding p-value from their comparisons using two-sample t-tests and Wilcoxon rank sum  
546 tests. \* indicates statistically significant differences between age groups at  $p < 0.05$ .
